# Supplementary material for: Highly efficient and stable MoS2FETs with reversible n-doping using a dehydrated poly(vinyl-alcohol) coating
Source: Royal Society of Chemistry journal article supplement (doi:10.1039/c6nr06980k), 2016-11-21
Supplement: c6nr06980k1.pdf [file c6nr06980k1.pdf]

## Supporting information:

### Highly efficient and stable MoS<sub>2</sub> FETs with reversible *n*-doping using a dehydrated poly(vinyl-alcohol) coating

César J. Lockhart de la Rosa,<sup>\*,a,b</sup> Amirhasan Nourbakhsh,<sup>a,‡</sup> Markus Heyne,<sup>a,c</sup> Inge Asselberghs,<sup>a</sup> Cedric

a. imec, Kapeldreef 75, B-3001 Leuven, Belgium.

b. Department of Metallurgy and Materials Engineering, KU Leuven, Kasteelpark Arenberg 44, B-3001 Leuven, Belgium.

c. Department of Chemistry, K. U. Leuven, Celestijnenlaan 200F, B-3001 Leuven, Belgium.

\* Corresponding author: [lockhart@imec.be](mailto:lockhart@imec.be)

‡With imec at the time of this work; currently with Massachusetts Institute of Technology, Cambridge, Massachusetts 02139, United States.

Huyghebaert,<sup>a</sup> Iuliana Radu,<sup>a</sup> Marc Heyns,<sup>a,b</sup> and Stefan De Gendt<sup>a,c</sup>

#### Electrical characterization of PVA

To ensure that the PVA coating makes no substantial contribution to the source drain current of the PVA-doped MoS<sub>2</sub> FET, we measured the current characteristics of a PVA film in a similar transistor configuration. The transfer characteristics of this PVA device are shown in Figure S1. The total current,  $I_D$ , which is composed of the current flowing through PVA and the back gate leakage current, was obtained from a device with  $L_{CH}$  2.5  $\mu\text{m}$  and  $W_{CH}$  of 28.1  $\mu\text{m}$  with 47 nm of PVA bridging the source and drain contacts. The current was orders of magnitude smaller than the corresponding value of the PVA-doped MoS<sub>2</sub> FET ( $|I_D/W| < 500$  fA), as expected for an insulating material.<sup>S1</sup>

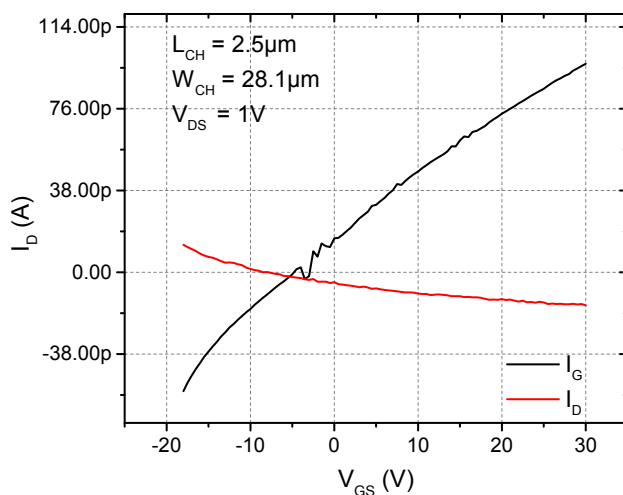

Figure S1: Plot of  $I_D$  against  $V_{GS}$  for a FET containing 1% PVA as a channel.

#### FTIR spectroscopic and XRD characterization of PVA films

Fourier transform infrared (FTIR) spectroscopy was used to extract information about the composition of the deposited PVA films. First a thick film ( $\sim 100 \mu\text{m}$ ) deposited by drop casting on a 55-nm-thick SiO<sub>2</sub> film on top of a silicon wafer was assessed for reference. The FTIR spectrum of this PVA film (Figure S4) clearly contained absorption peaks from O-H, C-H and C=O chemical groups.<sup>S2</sup>

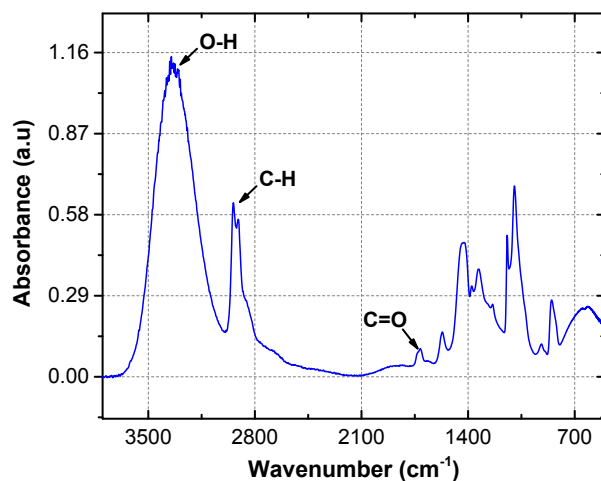

Figure S2: FTIR spectrum of a thick ( $\sim 100 \mu\text{m}$ ) PVA film.

Next, attenuated total reflectance FTIR (ATR-FTIR) spectroscopy was used to evaluate a 20-nm-thick PVA film spin coated on a 55-nm-thick  $\text{SiO}_2/\text{Si}$  substrate under the same conditions that were used in the experiments in the main paper. This ATR-FTIR spectrum is presented in Figure S5.

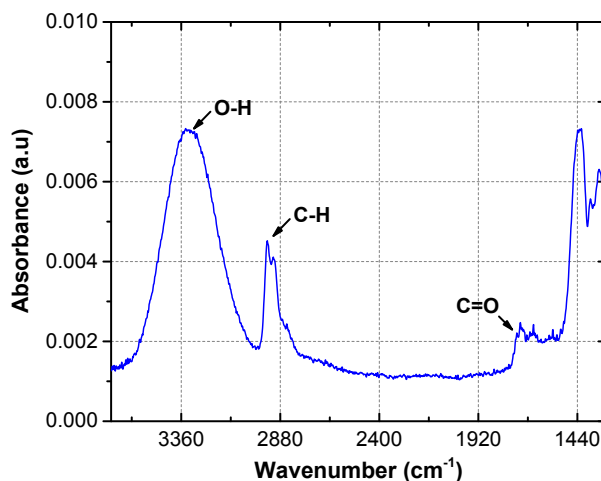

Figure S3: ATR-FTIR spectrum of a 50-nm-thick PVA film.

The same chemical groups can be identified in the ATR-FTIR spectrum of the 20-nm-thick film as in the FTIR spectrum of the thicker film. This is further proof of the formation of a thin PVA film by the described process. However, the peaks at lower wavenumbers were poorly resolved because of the small thickness of the material being sampled.

Next, grazing incidence X-ray diffraction (GI-XRD) patterns of thick PVA films ( $\sim 100 \mu\text{m}$ ) were collected to obtain information about the crystallinity of the material. Three different PVA films were assessed: A) as-deposited, B) as-deposited + annealed for 20 min at  $90^\circ\text{C}$  in  $\text{N}_2$  atmosphere, and C) as-deposited + annealed for 20 min at  $90^\circ\text{C}$  ( $\text{N}_2$ ) + aged for 1 day at room temperature (Figure S4).

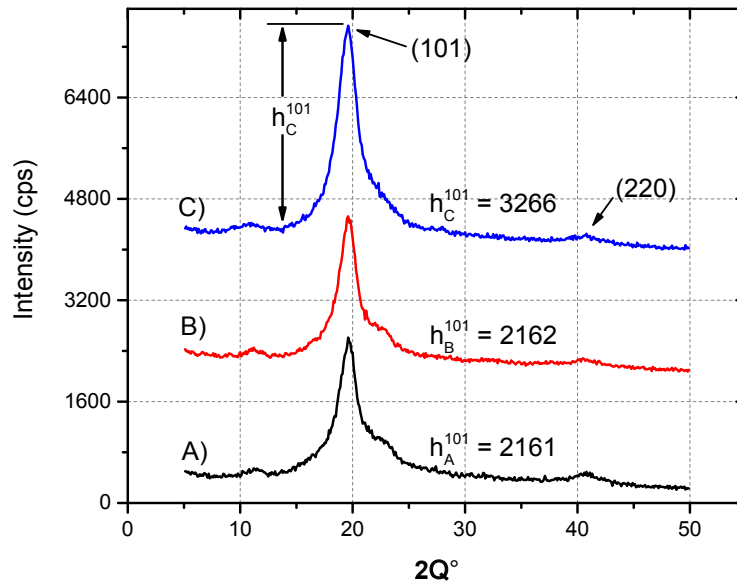

Figure S4: GI-XRD patterns of a thick ( $\sim 100 \mu\text{m}$ ) PVA film under different post-treatment conditions. The figures are shifted for better visualization.

The peak at around  $2\theta = 20^\circ$  corresponds to the 101 plane of semi-crystalline PVA.<sup>53</sup> Thus, the height of this peak can be used as an indication of the degree of crystallization of the PVA film.<sup>54</sup> The height of this peak did not change drastically when the sample was annealed at  $90^\circ\text{C}$  for 20 min. However, when the annealed sample was aged for 1 day, the relative height of the peak increased almost 51%, indicating that the crystallization of the PVA film increased. This observation supports the argument made in the main text that the device performance is enhanced by the crystallization of PVA.

### Influence of surface passivation on doping of $\text{MoS}_2$

It has been shown that surface passivation of thin-film  $\text{MoS}_2$  can partially alter its electrical performance<sup>55</sup>. Thus, to ensure that the charge modulation observed in our PVA-treated  $\text{MoS}_2$  FETs is mainly originated from doping effect rather than simply from surface passivation, two tests were performed:

First, as described in the methodology section, all the devices are measured in  $\text{N}_2$  atmosphere. This minimizes the time that the device is exposed to air. Thus, quenching of the intrinsic n-doping of the  $\text{MoS}_2$  film is not likely. Moreover, to demonstrate that the ambient air does not affect the device substantially, it was measured in vacuum condition ( $10^{-7}$  mbar) after degassing for 2 days. As shown in figure S5-a, the threshold voltage ( $V_{\text{TH}}$ ) shows a negligible variation when switching from  $\text{N}_2$  to vacuum condition, while after coating with PVA and measuring the device in  $\text{N}_2$  we observe a large negative shift in  $V_{\text{TH}}$ , which indicates n-doping.

Next, to ensure that the doping is not originating from a passivation effect of PVA but rather from its doping effect, we applied poly-trifluoroethylene (TrFE), a highly non-reactive thermoplastic fluoropolymer, on our  $\text{MoS}_2$  devices and compare them with PVA doped ones. As shown in figure S5-b TrFE passivation has minimum impact on the device  $V_{\text{TH}}$  (and thus its doping level) while the PVA doped device shows a strong  $V_{\text{TH}}$  shift. We believe these results rule out substantial contribution arising from surface passivation.

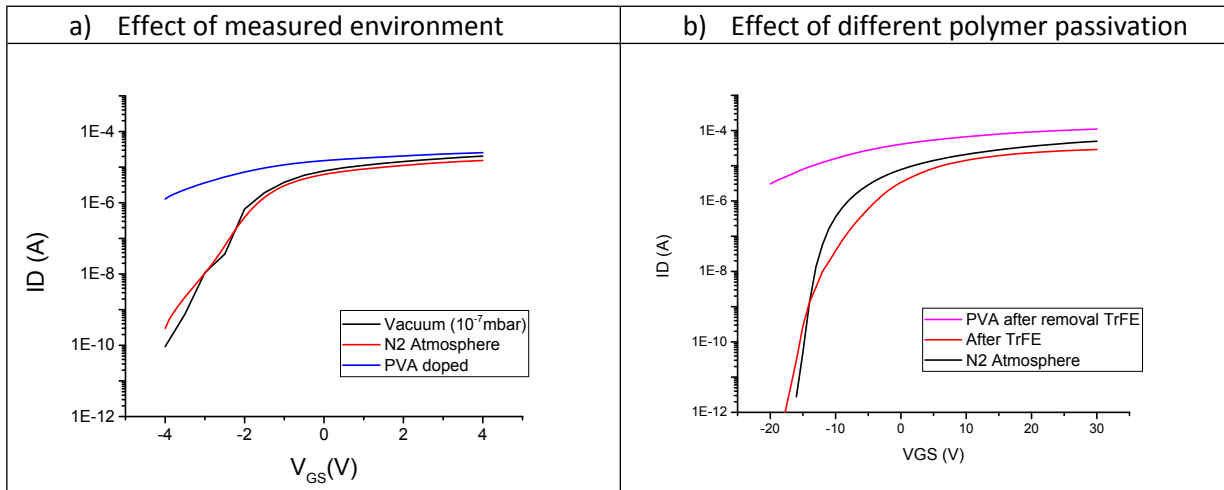

**Figure S5:**  $I_d$ - $V_g$  of a MoS<sub>2</sub> FET measured in N<sub>2</sub> and vacuum conditions before and after PVA doping. (b) PVA vs TrFE coated MoS<sub>2</sub> FET

#### References:

1. Abdullah, Omed Gh.; Hussen, Sarkawt A.; Alani, Ahmad. Electrical characterization of polyvinyl alcohol films doped with sodium iodide. *Asian Transactions on Science & Technology* 2011, 01, ISSN: 2221-4283.
2. Mansur, Herman S.; Sadahira, Carolina M.; Souza, Adriana N.; Mansur, Alexandra A.P. FTIR spectroscopy characterization of poly(vinyl alcohol) with different hydrolysis degree and chemically crosslinked with glutaraldehyde. *Material Science and Engineering C* 2008, 28, 539-548.
3. Assender, Hazel E.; Windle, Alan H. Crystallinity in poly(vinyl alcohol). 1. An X-ray diffraction study of atactic PVOH. *Polymer* 1998, 39, 4295-4302.
4. Twansi, A.; Zidan, H. M.; Oraby, A. H.; Dorgham, M. E. Short-range-order spin clusters in one-dimensional Ising-like antiferromagnetic CoBr<sub>2</sub>-filled PVA films: a study of physical properties. *J. phys. D: Appl. Phys.* 1998, 31, 3428-3436.
5. Yue, D.; Lee, D.; Jang, Y. D.; Choi, M. S.; Nam, H. J.; Jung, D. Y.; Yoo, W. J. Passivated ambipolar blackphosphorus transistors. *Nanoscale*, 2016, 8, 12773-12779.
